# Supplementary material
Source: PubMed Central journal article supplement (PMC6463718)
Supplement: supp_RA118.007290_142772_1_supp_286773_pmzfxm.pdf [file supp_RA118.007290_142772_1_supp_286773_pmzfxm.pdf]

Supp Figure 1

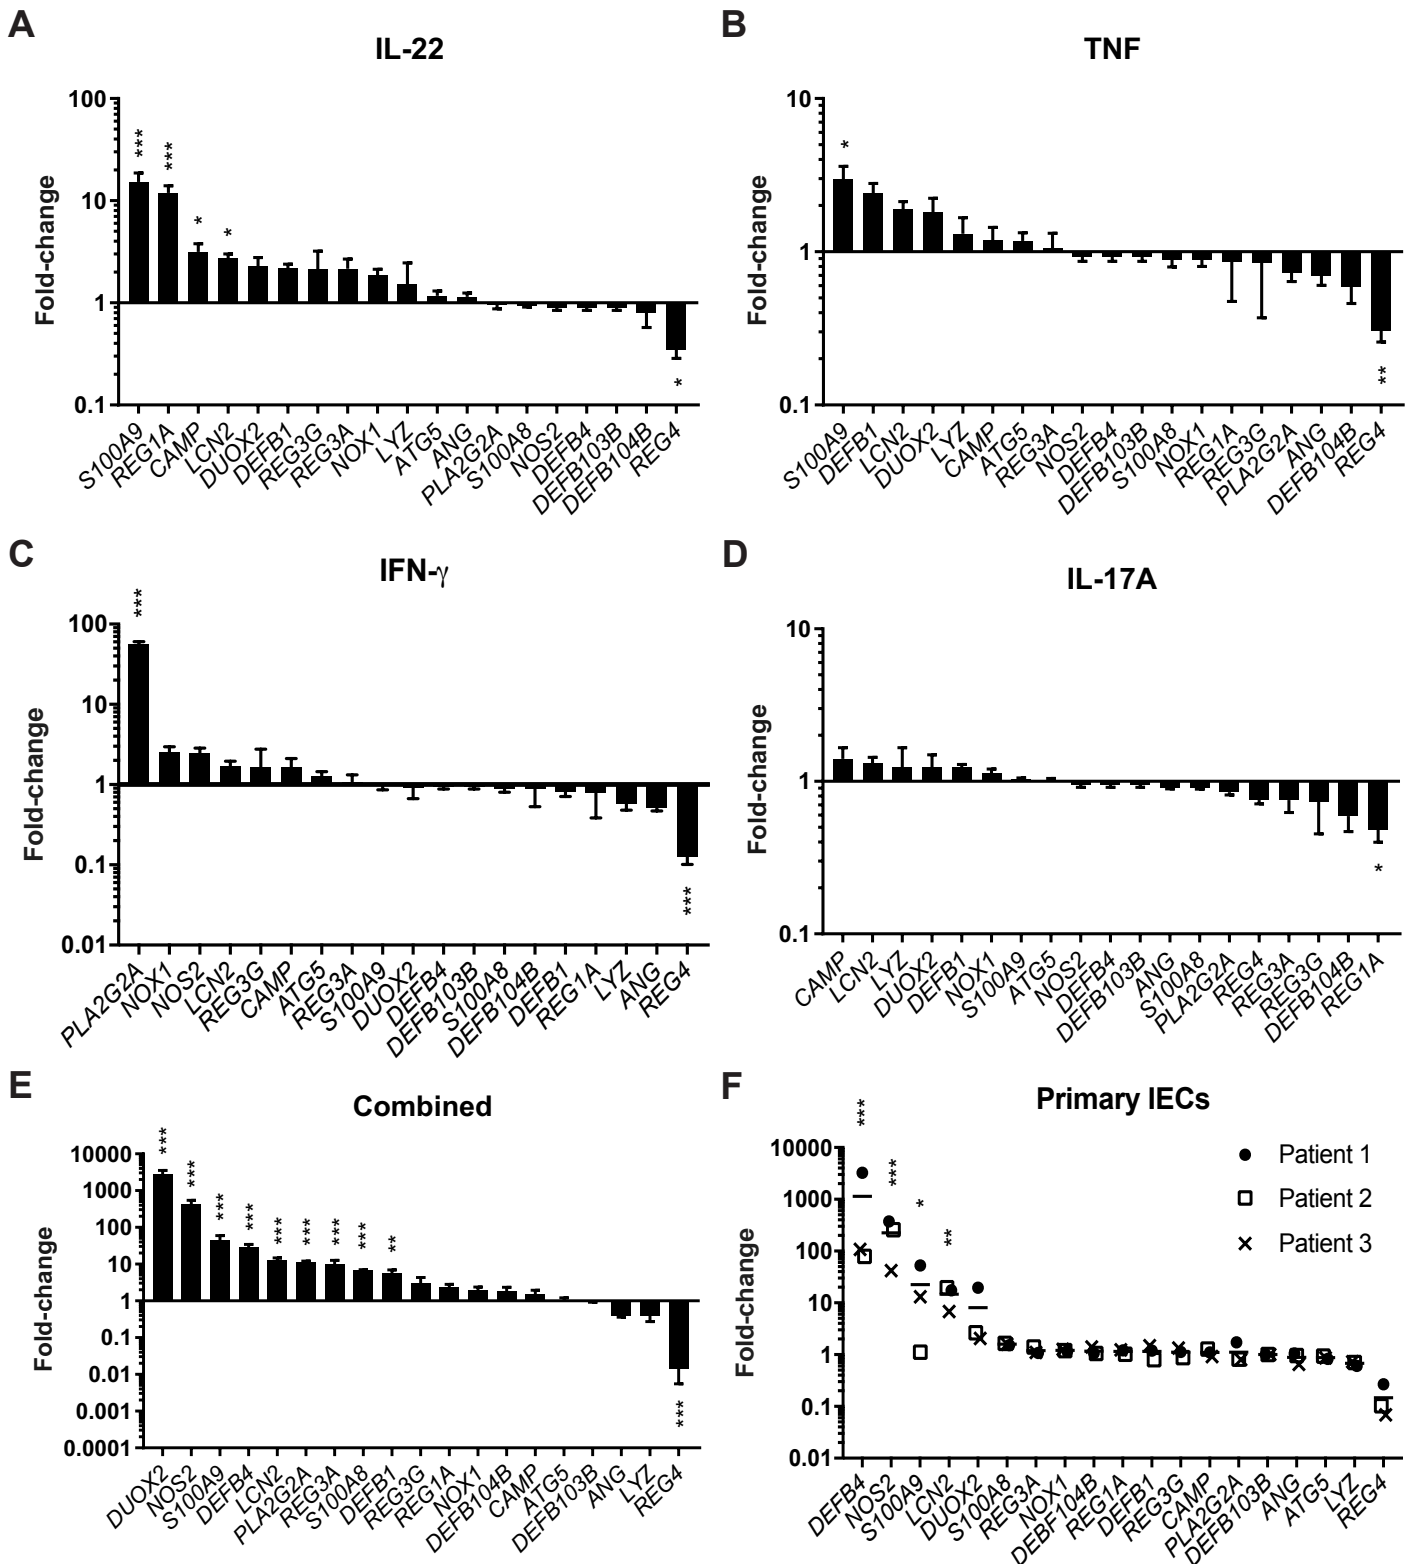

**Supplementary Figure 1: Cytokine-mediated antimicrobial gene and protein expression in human IECs.** HT-29 cells were stimulated for 24 h with (A) IL-22 (50 ng/ml), (B) TNF (20 ng/ml), (C) IFN- $\gamma$  (10 ng/ml), (D) IL-17A (50 ng/ml) or (E) a combination of these cytokines after which gene expression for the indicated genes was determined by qPCR. Values indicate the mean with s.e.m. of three independent experiments. Statistical analysis performed with One-Way ANOVA followed by Dunnett's post-hoc test comparing to unstimulated controls. (F) Primary human CD45-depleted intestinal cells were stimulated for 24 h with IL-17A (50 ng/ml), IL-22 (50 ng/ml), TNF (20 ng/ml) and IFN- $\gamma$  (10 ng/ml) after which gene expression for the indicated genes was determined by qPCR. Each symbol represents the fold-change compared to unstimulated cells within each patient sample. For each gene, average gene expression over the three samples is indicated as well. Statistical analysis was performed with One-Way ANOVA followed by Dunnett's post-hoc test comparing to unstimulated controls.  $p < 0.05 = *$ ,  $p < 0.005 = **$ ,  $p < 0.0005 = ***$ .

## Supp Figure 2

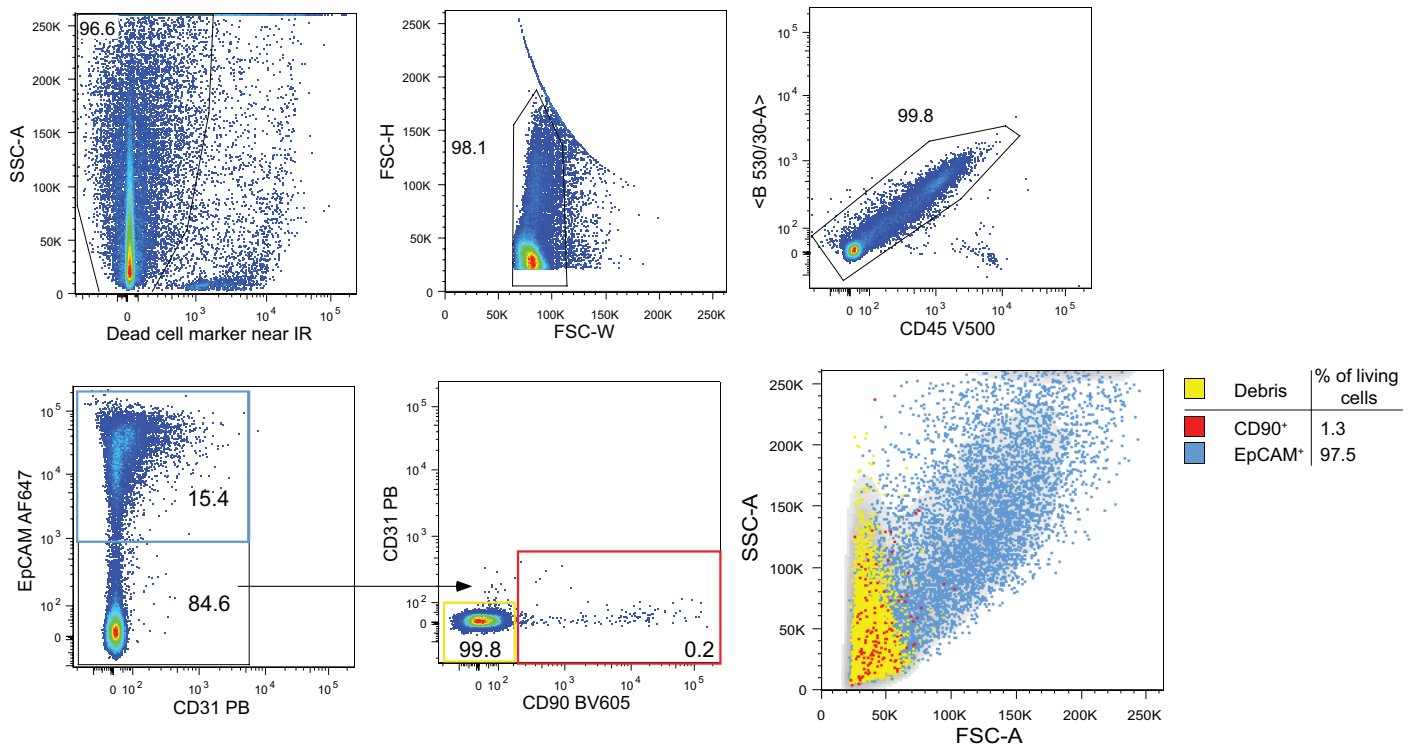

**Supplementary Figure 2: Identification of epithelial cells in CD45-depleted primary human colon-derived cells.** Staining of primary colon-derived cells after CD45 depletion. After selecting viable (top left), singlet cells (top center), depletion of CD45 cells was confirmed by flow cytometry (top right). Plotting stainings for CD31 (endothelial marker) and EpCam (epithelial marker) (bottom left) or CD31 and CD90 (fibroblasts) (bottom center) was performed, which showed (after excluding debris) that 97.5% of isolated cells was EpCam<sup>+</sup> (bottom right). Colored rectangles in bottom plots correspond to EpCam<sup>+</sup> cells (blue), CD90<sup>+</sup> cells (red) and debris (yellow) in the bottom right plot.

Supp Table I: qPCR primers

| <b>Target</b>                    | <b>Forward</b>            | <b>Reverse</b>             |
|----------------------------------|---------------------------|----------------------------|
| <b>LCN2</b>                      | GGTAGGCCTGGCAGGGAATG      | CTTAATGTTGCCAGCGTGAAC      |
| <b>S100A8</b>                    | TATCAGGAAAAAGGGTGCAGACG   | TGCCACGCCCATCTTTATCA       |
| <b>S100A9</b>                    | GCAGCTGGAACGCAACATAG      | TGTGTCCAGGTCCTCCATGA       |
| <b>ANG</b>                       | GTGCTGGGTCTGGGTCTGAC      | GGCCTTGATGCTGCGCTTG        |
| <b>PLA2G2A</b>                   | GAGCAGAATCACCTGTGCAA      | GTGCTCCCTCTGCAGTGTTT       |
| <b>CAMP</b>                      | TCCTCGGATGCTAACCTCT       | TGACTGCTGTGTGCTCCT         |
| <b>REG1A</b>                     | TGGAAGGATGTGCCTTGTGAAGACA | AGGCAAACCTCAGCAGAGAAGAGAGT |
| <b>REG3A</b>                     | CGCTGTCCCAAAGGCTCCAAG     | GCACAGACACCAGGTTTCCAGAGG   |
| <b>REG3G</b>                     | AGGATTTCTGAAGTGGAAG       | ATGACAAGGTAGTCAGGTAG       |
| <b>REG4</b>                      | GGGTGGGAACAAGCACTG        | GTCTCTAAGCCTAAAAAAGCC      |
| <b>DEFB1</b>                     | ATGGCCTCAGGTGGTAACTTTC    | CACTTGGCCTTCCCTCTGTAAC     |
| <b>DEFB4A</b>                    | GCCTCTTCCAGGTGTTTTTG      | GAGACCACAGGTGCCAATTT       |
| <b>DEFB103B</b>                  | AGCCTAGCAGCTATGAGGATC     | CTTCGGCAGCATTTTTCGGCCA     |
| <b>DEFB104B</b>                  | TGTCGCAGCCAAGAATACAGA     | AGCTCTCATCCCATTTTCTCAA     |
| <b>LYZ</b>                       | CCTGCAGTGCTTTGCTGCAAGATA  | TCTCCATGCCACCCATGCTCTAAT   |
| <b>NOS2</b>                      | GGTAGAGGCCTGGAAAACCC      | ATGGTGA CTCTGACTCGGGA      |
| <b>NOX1</b>                      | GCAGGGGACTGGACAGAAAA      | AACCAGCACAGCCACTTCAT       |
| <b>DUOX2</b>                     | ACGCAGCTCTGTGTCAAAGGT     | TGATGAACGAGACTCGACAGC      |
| <b>ATG5</b>                      | GCAACTCTGGATGGGATTGC      | CCTAGTGTGTGCAACTGTCCA      |
| <b>18S</b>                       | GTAACCCGTTGAACCCCAT       | CCATCCAATCGGTAGTAGCG       |
| <b>LCN2 promotor (-131, -30)</b> | GTCCCTCTGTCTTGCCCAAT      | TCTTTGCCAAGGCCAGGAAT       |
